# Supplementary material for: New findings in the metabolism of the saffron apocarotenoids, crocins and crocetin, by the human gut microbiota
Source: Royal Society of Chemistry journal article supplement (doi:10.1039/d4fo02233e), 2024-01-01

**Supplementary Figure 1.** GC-MS chromatogram of fecal samples from volunteer 1 incubated for 48 hours with crocetin after applying a methyl esterification reaction. 1: tridecanoic acid 12-methyl-methyl ester; 2: hexadecanoic acid methyl ester; 3: octadecanoic acid methyl ester; 4: 13-docosenoic acid methyl ester.

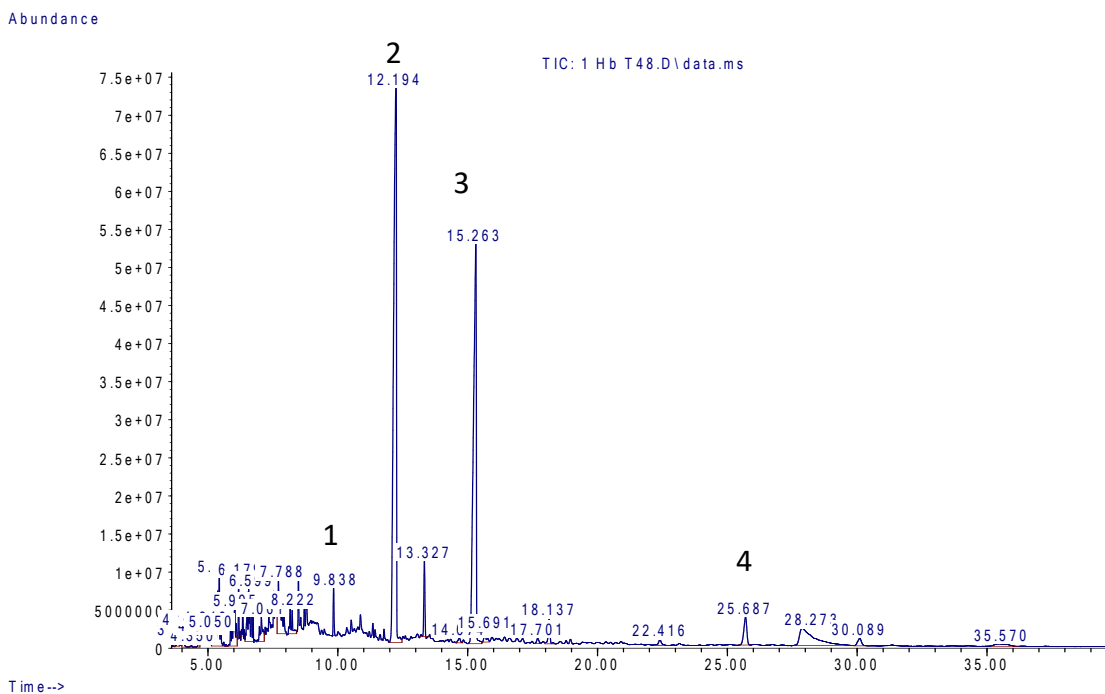

**Supplementary Figure 2.** Changes in short chain fatty acids after incubation of fecal samples from volunteer 1 at different times with crocetin (blue squares) and without crocetin (black circles). A: acetic acid, B: propionic acid, C: isobutyric acid, D: butyric acid, E: isovaleric acid, F: valeric acid; G: hexanoic acid.

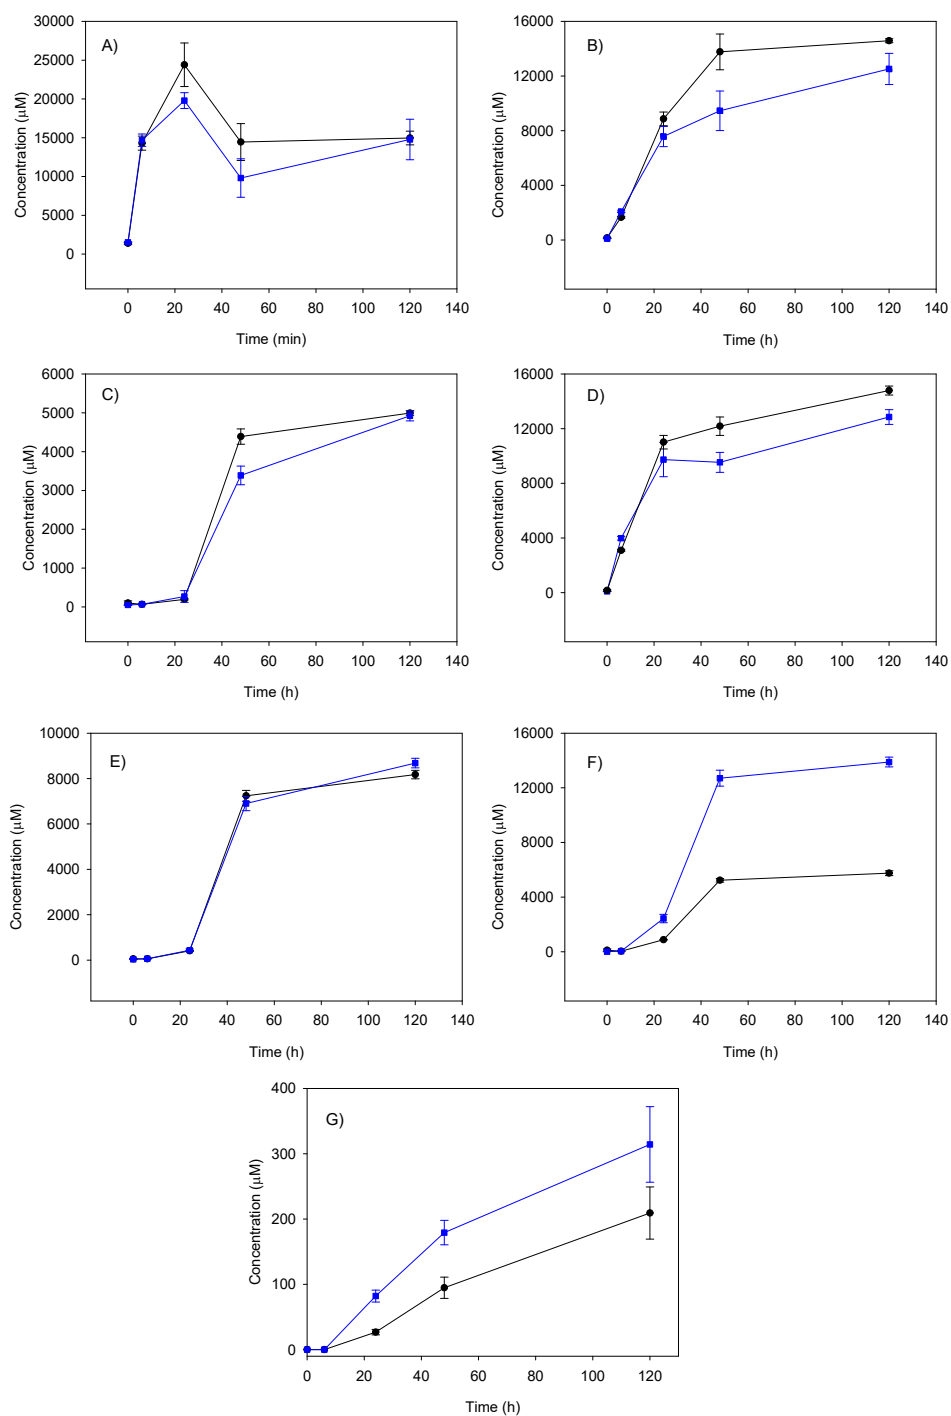

Supplement: d4fo02233e1.pdf [file d4fo02233e1.pdf]
